**S4 Figure.** Dose-Response curves underlying the 96-h  $EC_{50}$  calculations for (A) 0, (B) 1, (C) 3 and (D) 6 d aged  $nTiO_2$  in ASTM with NOM. The mean mortality for each treatment is indicated by an open circle, while the filled circle represents the  $EC_{50}$  value together with its 95% confidence interval.

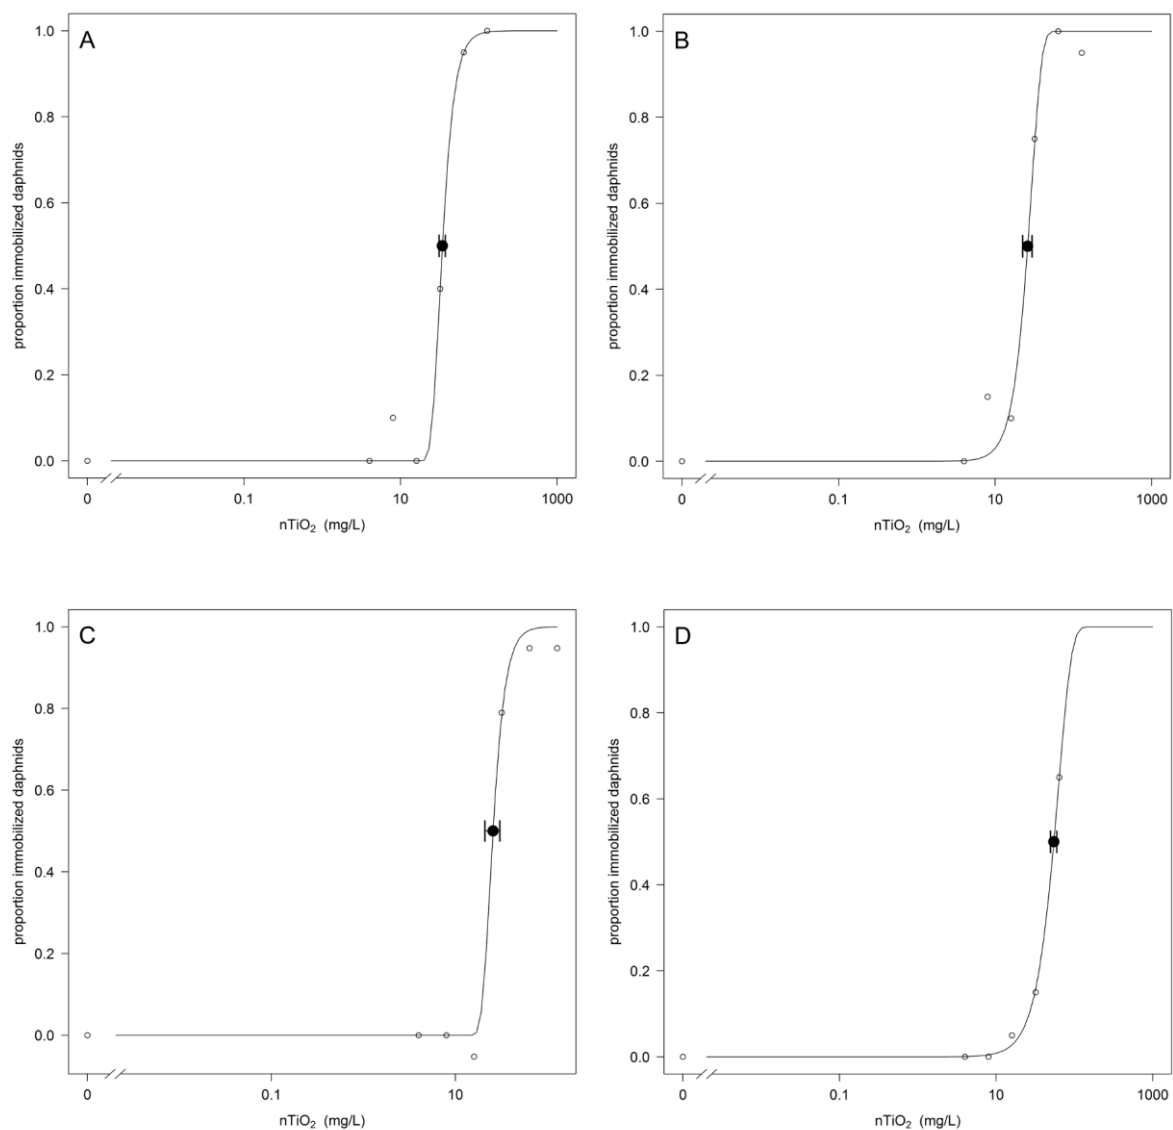

Source: https://portal.kobv.de/redirect.do?ind=11&index=crossrefExt&plv=2&target=crossref_info%3Adoi%2F10.1371%252Fjournal.pone.0126021
